# Supplementary material
Source: HighWire-hosted journal article supplement (https://www.jrheum.org/highwire/filestream/39652/field_highwire_adjunct_files/0/200893DataSuppl.pdf)
Supplement: 200893DataSuppl.pdf [file 200893DataSuppl.pdf]

## **ONLINE SUPPLEMENTARY MATERIAL**

**Supplementary Data 1.** The number of patients enrolled from each country in Part A was: Mexico (n=8), Poland (n=3) and United States (n=25). The number of patients enrolled from each country in Part B was: Argentina (n=57), Australia (n=3), Austria (n=1), Italy (n=10), Japan (n=25), Korea (n=8), Mexico (n=27), Poland (n=29), Slovakia (n=4), South Africa (n=13), Spain (n=13), and the United States including Puerto Rico (n=60).

**Supplementary Table 1.** Treatment-emergent adverse events in Part A within the blinded treatment dosing period

|                                                          | Placebo<br>(N=9) | Poseltinib |              |             |
|----------------------------------------------------------|------------------|------------|--------------|-------------|
|                                                          |                  | 5-mg (N=9) | 10-mg (N=10) | 30-mg (N=8) |
| Overview of adverse events                               |                  |            |              |             |
| Treatment emergent and follow up-emergent adverse events | 6 (66.7)         | 3 (33.3)   | 6 (60.0)     | 2 (25.0)    |
| Death                                                    | 0                | 0          | 0            | 0           |
| Serious adverse events                                   | 0                | 0          | 0            | 0           |
| Discontinuation from study due to adverse event          | 0                | 0          | 0            | 0           |
| Treatment-emergent adverse events by preferred term      |                  |            |              |             |
| Constipation                                             | 0                | 0          | 0            | 1 (12.5)    |
| Diarrhea                                                 | 1 (11)           | 0          | 0            | 0           |
| Dry mouth                                                | 0                | 1 (11)     | 0            | 0           |
| Nausea                                                   | 0                | 0          | 1 (10)       | 0           |
| Non-cardiac chest pain                                   | 0                | 0          | 1 (10)       | 0           |
| Bronchitis                                               | 0                | 0          | 0            | 1 (12.5)    |
| Laryngitis                                               | 0                | 0          | 1 (10)       | 0           |
| Pharyngitis                                              | 1 (11)           | 0          | 0            | 0           |
| Sinusitis                                                | 1 (11)           | 0          | 0            | 0           |
| Urinary tract infection                                  | 0                | 0          | 1 (10)       | 0           |
| Hypertriglyceridemia                                     | 0                | 0          | 1 (10)       | 0           |
| Hypokalemia                                              | 1 (11)           | 0          | 0            | 0           |
| Osteopenia                                               | 0                | 1 (11)     | 0            | 0           |
| Headache                                                 | 0                | 0          | 2 (20.0)     | 1 (12.5)    |
| Carotid artery aneurysm                                  | 1 (11)           | 0          | 0            | 0           |
| Dizziness                                                | 1 (11)           | 0          | 0            | 0           |
| Cough                                                    | 0                | 0          | 1 (10)       | 0           |

Data are n (%)

**Supplementary Table 2.** Treatment-emergent adverse events that occurred in  $\geq 2.0\%$  of patients in any treatment group in Part B within the blinded treatment dosing period.

|                                    | Placebo<br>(N=62) | Poseltinib  |              |              |
|------------------------------------|-------------------|-------------|--------------|--------------|
|                                    |                   | 5-mg (N=63) | 10-mg (N=62) | 30-mg (N=63) |
| Nasopharyngitis                    | 2 (3.2)           | 3 (4.8)     | 1 (1.6)      | 5 (7.9)      |
| Pharyngitis                        | 2 (3.2)           | 0           | 1 (1.6)      | 3 (4.8)      |
| Influenza                          | 0                 | 1 (1.6)     | 2 (3.2)      | 2 (3.2)      |
| Gastroenteritis                    | 2 (3.2)           | 0           | 1 (1.6)      | 1 (1.6)      |
| Upper respiratory tract infection  | 1 (1.6)           | 0           | 2 (3.2)      | 1 (1.6)      |
| Oral herpes                        | 0                 | 0           | 1 (1.6)      | 2 (3.2)      |
| Bronchitis                         | 0                 | 0           | 0            | 2 (3.2)      |
| Rash                               | 1 (1.6)           | 0           | 3 (4.8)      | 3 (4.8)      |
| Rash maculo-papular                | 1 (1.6)           | 0           | 0            | 3 (4.8)      |
| Urticaria                          | 0                 | 0           | 1 (1.6)      | 2 (3.2)      |
| Rheumatoid arthritis               | 1 (1.6)           | 3 (4.8)     | 4 (6.5)      | 2 (3.2)      |
| Back pain                          | 1 (1.6)           | 2 (3.2)     | 0            | 1 (1.6)      |
| Diarrhea                           | 0                 | 1 (1.6)     | 0            | 2 (3.2)      |
| Dyspepsia                          | 1 (1.6)           | 0           | 0            | 2 (3.2)      |
| Abdominal distension               | 0                 | 0           | 0            | 2 (3.2)      |
| Fatigue                            | 0                 | 0           | 0            | 4 (6.3)      |
| Pyrexia                            | 0                 | 3 (4.8)     | 0            | 1 (1.6)      |
| Alanine aminotransferase increased | 0                 | 0           | 2 (3.2)      | 2 (3.2)      |
| Anemia                             | 0                 | 0           | 1 (1.6)      | 3 (4.8)      |
| Hypokalemia                        | 0                 | 0           | 0            | 2 (3.2)      |

Data are n (%)
